# Supplementary material
Source: Springer Nature journal article supplement (https://www.springermedizin.de/resource/supplementary/13011_2010_140_MOESM3_ESM.pdf/9628482)

-1.00

-0.50

0.00

0.50

1.00

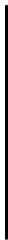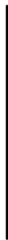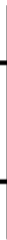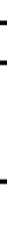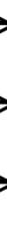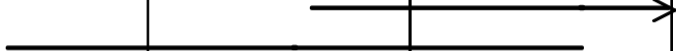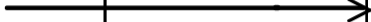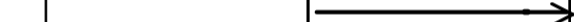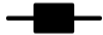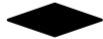

Supplement: MOESM3 [file 9628482]
